# Supplementary material
Source: publisher figshare collection journal article supplement (https://sage.figshare.com/ndownloader/files/13773761)
Supplement: Supplementary file 1 [file 13773761]

**Table 1: Survey Respondents<sup>1</sup>**

| Respondent                                                   | Organization Type | 2012 | 2016            |
|--------------------------------------------------------------|-------------------|------|-----------------|
| Abbvie                                                       | Pharmaceutical    | Yes  | Yes             |
| Amgen                                                        | Pharmaceutical    | Yes  | Yes             |
| Aptiv Solutions                                              | CRO               | Yes  | No <sup>2</sup> |
| Astellas                                                     | Pharmaceutical    | No   | Yes             |
| AstraZeneca                                                  | Pharmaceutical    | Yes  | Yes             |
| Boehringer Ingelheim                                         | Pharmaceutical    | No   | Yes             |
| Bristol-Myers Squib                                          | Pharmaceutical    | No   | Yes             |
| Cardinal Systems                                             | CRO               | Yes  | No <sup>2</sup> |
| Cytel                                                        | CRO               | Yes  | Yes             |
| Dana Farber Cancer Institute                                 | Academic          | No   | Yes             |
| Eli Lilly and Company                                        | Pharmaceutical    | Yes  | Yes             |
| George Institute for Global Health                           | CRO               | Yes  | Yes             |
| Geron                                                        | Pharmaceutical    | Yes  | No              |
| GlaxoSmithKline                                              | Pharmaceutical    | Yes  | Yes             |
| Hannover Medical School                                      | Academic          | No   | Yes             |
| Icon                                                         | CRO               | Yes  | No              |
| Janssen Pharmaceuticals<br>Companies of<br>Johnson & Johnson | Pharmaceutical    | Yes  | Yes             |
| Juno Therapeutics                                            | Pharmaceutical    | No   | Yes             |
| Lancaster University                                         | Academic          | No   | Yes             |
| Menarini Ricerche                                            | Pharmaceutical    | No   | Yes             |
| Merck                                                        | Pharmaceutical    | Yes  | Yes             |

|                                               |                |     |     |
|-----------------------------------------------|----------------|-----|-----|
| Mitsubishi Tanabe Pharma Europe               | Pharmaceutical | No  | Yes |
| MRC Biostatistics Unit                        | Academic       | No  | Yes |
| Novartis                                      | Pharmaceutical | Yes | Yes |
| Pfizer                                        | Pharmaceutical | Yes | No  |
| PPD                                           | CRO            | No  | Yes |
| Premier Research                              | CRO            | No  | Yes |
| Quintiles                                     | CRO            | Yes | Yes |
| Sanofi                                        | Pharmaceutical | Yes | Yes |
| Statistics Collaborative                      | CRO            | No  | Yes |
| University of North Carolina at Chapel Hill   | Academic       | No  | Yes |
| University of Iowa                            | Academic       | Yes | Yes |
| University of Texas MD Anderson Cancer Center | Academic       | No  | Yes |

Footnote 1: Note that only institutions who responded to at least one survey (2012 or 2016) are listed, i.e., all 114 institutions contacted in 2016 are not listed.

Footnote 2: Aptiv Solutions and Cardinal Systems were both acquired in 2014 by other companies. So, while they responded to the 2012 survey, they were not respondents in 2016.
